# Supplementary material for: Low-cost architecture for iron-based coated conductors
Source: PubMed Central journal article supplement — iScience. 2024 Sep 26;27(10):111032. doi: 10.1016/j.isci.2024.111032 (PMC11519430; doi:10.1016/j.isci.2024.111032), 2024-09-26
Supplement: mmc1.pdf [file mmc1.pdf]

**iScience, Volume 27**

## **Supplemental information**

### **Low-cost architecture for iron-based coated conductors**

**L. Piperno, A. Vannozzi, F. Rizzo, A. Masi, A. Rufoloni, G. Celentano, V. Braccini, M. Cialone, M. Iebole, A. Martinelli, L. Savio, M. Putti, A. Meledin, and G. Sotgiu**

## Supplementary Material

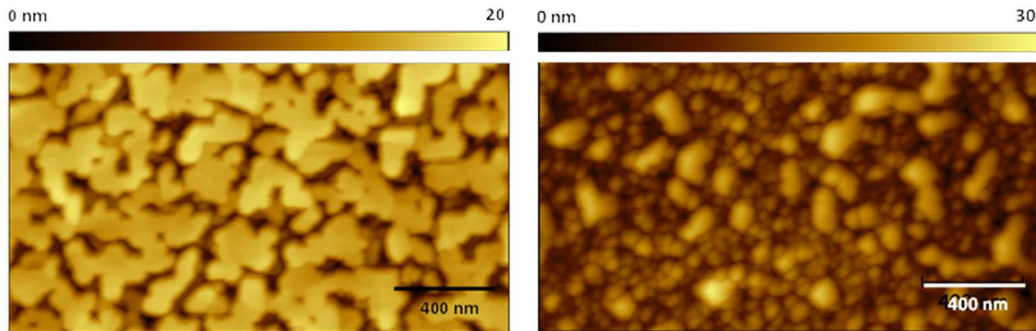

Fig. S1: AFM images of a CZO film obtained via MOD, related to Figure 1. Left: morphology of the majority of the sample surface; Right: different morphology observed in some areas of the samples.

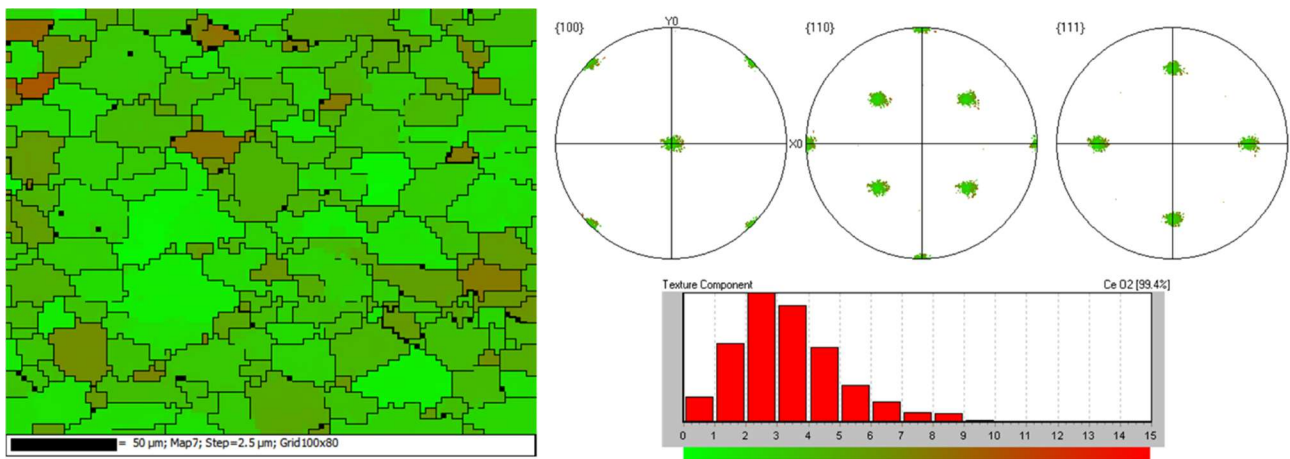

Fig. S2: EBSD analysis of a (MOD) CZO buffered Ni-W substrate, related to figure 1. Left: misorientation map with respect to the ideal orientation  $\langle 110 \rangle / (001)$ ; Right: generated pole figures and misorientation distribution of the same area.

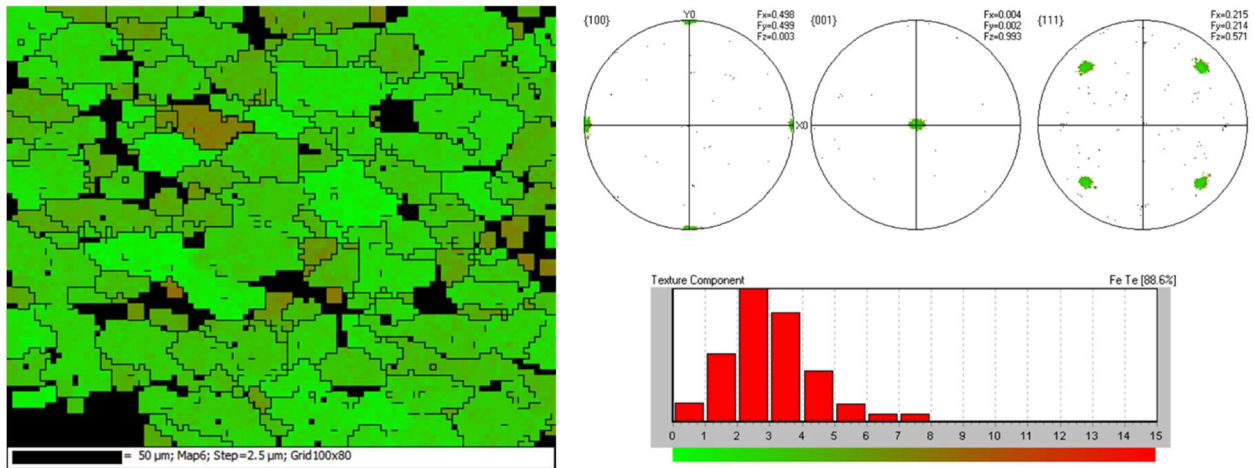

Fig. S3: EBSD analysis of a Fe(Se,Te) film grown on a (MOD) CZO buffered Ni-W substrate, related to Figure 4. Left: misorientation map with respect to the ideal orientation  $\langle 100 \rangle / (001)$ ; Right, generated pole figures and misorientation distribution of the same area.

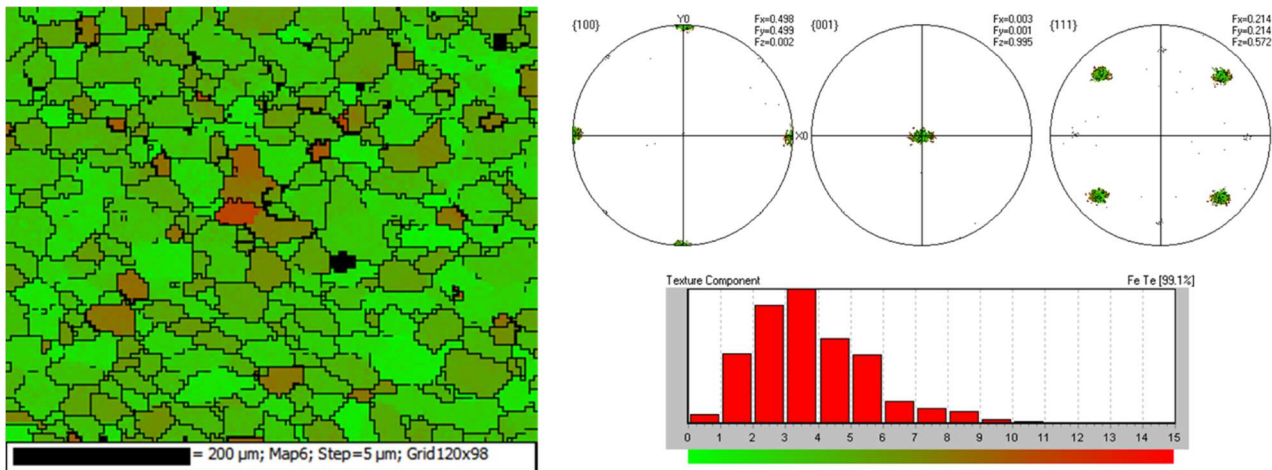

Fig. S4: EBSD analysis of a Fe(Se,Te) film grown on a (PLD) CeO<sub>2</sub> buffered Ni-W substrate, related to Figure 9: Left, misorientation map with respect to the ideal orientation  $\langle 100 \rangle / (001)$ ; Right: generated pole figures and misorientation distribution of the same area.
